# Supplementary material
Source: publisher figshare collection journal article supplement (https://tandf.figshare.com/articles/dataset/_/5248186)
Supplement: Supplementary file 1 [file 2]

## Sheet: Table 1S Specimens
AL Specimens
Prefix	Site	Specimen	Side	upper.lower	Element	ElementPortion	Family	Tribe.qualifier	Tribe	Genus.qualifier	Genus	Species.qualifier	Species	Notes	AnalyticalUnitFound
A.L.	70	12	R&L		horn cores	left basal, right midsection	Bovidae		Tragelaphini		Tragelaphus		rastafari/nakuae	probably(?) Gurumaha, but could also be Bulinan, or a mix of both (Kalb’s polygon looks to cross several faults)	Gurumaha
A.L.	71	1	R	lower	m3	partial	Bovidae		Alcelaphini					Unknown, not marked on Kalb’s map	Unknown
A.L.	72	12	R		mandible	with p4-m3	Bovidae		Alcelaphini					Lee Adoyta (although could possibly include some Gurumaha)	Lee Adoyta
A.L.	74	16			horn core	midsection	Bovidae							Gurumaha and/or Ogoyta (fault cuts right through Kalb’s polygon)	Ogoyta / Gurumaha
A.L.	74	18			horn core	midsection	Bovidae	cf.	Alcelaphini	cf.	Connochaetes			Gurumaha and/or Ogoyta (fault cuts right through Kalb’s polygon)	Ogoyta / Gurumaha
A.L.	74	19	R		horn core	distal	Bovidae	cf.	Tragelaphini					Gurumaha and/or Ogoyta (fault cuts right through Kalb’s polygon)	Ogoyta / Gurumaha
A.L.	83	9		lower	m	fragment	Bovidae		Alcelaphini					probably Lee Adoyta (close to fault up against basalt)	Lee Adoyta
A.L.	85	1			horn core	midsection	Bovidae	cf.	Reduncini					Gurumaha	Gurumaha
A.L.	87	1	R	lower	m3		Bovidae		Aepycerotini		Aepyceros			probably(?) Lee Adoyta, but could also be Ogoyta, or a mix of both (Kalb’s polygon is very close to fault)	Lee Adoyta
A.L.	87	3	L	lower	m3	partial	Bovidae		Alcelaphini					probably(?) Lee Adoyta, but could also be Ogoyta, or a mix of both (Kalb’s polygon is very close to fault)	Lee Adoyta
A.L.	87	7		upper	molar	fragment	Bovidae							probably(?) Lee Adoyta, but could also be Ogoyta, or a mix of both (Kalb’s polygon is very close to fault)	Lee Adoyta
A.L.	94	1			cranial parts with horn cores	R&L HCs, braincase frag	Bovidae		Alcelaphini		Beatragus		vrbae	probably Lee Adoyta. Not marked on Kalb’s map, but he says it is right next to A.L. 95, which is Lee Adoyta.	Lee Adoyta
A.L.	94	3	R		mandible	with m2-m3	Bovidae		Alcelaphini					probably Lee Adoyta. Not marked on Kalb’s map, but he says it is right next to A.L. 95, which is Lee Adoyta.	Lee Adoyta
LD	1	1			molar	fragment	Bovidae		Alcelaphini						Lee Adoyta
LD	3	1	R		calcaneus	complete	Bovidae								Gurumaha
LD	4	1	L		tibia	distal	Bovidae								Gurumaha
LD	6	5	L		horn core	basal	Bovidae	cf.	Alcelaphini						Gurumaha
LD	6	1	R		tibia	distal	Bovidae								Gurumaha
LD	6	3	indet		scaphoid	complete	Bovidae								Gurumaha
LD	9	1	L		femur	distal	Bovidae								Gurumaha
LD	10	1	L		humerus	proximal (a) and distal (b)	Bovidae								Gurumaha
LD	10	2	indet		metapodial	distal trochlea frag	Bovidae								Gurumaha
LD	12	1	L	upper	M1 or M2		Bovidae		Alcelaphini						Gurumaha
LD	13	1	R		astragalus	complete	Bovidae								Gurumaha
LD	13	3			molar	fragment	Bovidae								Gurumaha
LD	14	1	R		mandible	frag, no teeth	Bovidae								Gurumaha
LD	15	1	L	lower	molar	fragment	Bovidae		Bovini						Gurumaha
LD	16	1	R		femur	distal	Bovidae								Lee Adoyta
LD	16	2	indet		tarsal	complete	Bovidae								Lee Adoyta
LD	16	3	R		astragalus	complete	Bovidae								Lee Adoyta
LD	18	1	R		tibia	distal	Bovidae								Lee Adoyta
LD	19	1	L		humerus	distal	Bovidae								Lee Adoyta
LD	21	3	L		navicular-cuboid	complete	Bovidae								Lee Adoyta
LD	25	3	R	lower	molar	fragment	Bovidae		Alcelaphini						Lee Adoyta
LD	25	5	R	lower	m1		Bovidae		Alcelaphini	cf.	Connochaetes				Lee Adoyta
LD	25	2	R		calcaneus	complete	Bovidae								Lee Adoyta
LD	27	2	L		calcaneus	almost complete	Bovidae								Lee Adoyta
LD	28	1			pelvis	acetabulum	?Bovidae								Lee Adoyta
LD	30	2	R		humerus	distal	Bovidae								Lee Adoyta
LD	31	1	L		humerus	distal	Bovidae								Lee Adoyta
LD	32	1	L	lower	p3 or p4		Bovidae		Bovini						Lee Adoyta
LD	34	2	R		horn core	basal with frontlet, and podial	Bovidae		?Antilopini	cf.	Gazella				Lee Adoyta
LD	34	1	R		radius (a), ulna (b)	prox rad, prox ulna	Bovidae								Lee Adoyta
LD	37	1	L		metacarpal	complete	Bovidae								Lee Adoyta
LD	39	1	L		radius	proximal	Bovidae								Lee Adoyta
LD	39	2	L		ulna	proximal	Bovidae								Lee Adoyta
LD	40	1			molar	fragments	Bovidae		Alcelaphini						Lee Adoyta
LD	42	2		upper	molar		Bovidae		Alcelaphini						Ogoyta
LD	42	1		upper	molar	fragment	Bovidae								Ogoyta
LD	43	1		upper	molar	fragment	Bovidae								Ogoyta
LD	44	2			tooth	fragment	?Bovidae								Lee Adoyta
LD	45	1	indet		phalanx	proximal	Bovidae								Lee Adoyta
LD	46	1			molar	fragment	Bovidae								Lee Adoyta
LD	48	1	R		radius	proximal + distal frags	Bovidae								Lee Adoyta
LD	49	1		upper	molar	fragment	Bovidae		Alcelaphini						Lee Adoyta
LD	51	1	L		calcaneus	proximal	Bovidae								Lee Adoyta
LD	53	1	indet		metatarsal	distal	Bovidae								Lee Adoyta
LD	54	1	R&L		horn cores	right basal, left distal	Bovidae		Aepycerotini		Aepyceros				Lee Adoyta
LD	55	1	L		ulna	proximal	Bovidae								Lee Adoyta
LD	56	1	L		scapula	proximal	Bovidae								Lee Adoyta
LD	58	1			horn core	two midsections, one is near the base	Bovidae	cf.	Alcelaphini						Lee Adoyta
LD	60	1			cranial parts with horn cores	conjoined R&L HCs and frontlet, braincase	Bovidae		Alcelaphini		Beatragus		vrbae		Lee Adoyta
LD	60	4	R		calcaneus	complete	Bovidae	cf.	Alcelaphini	cf.	Beatragus	cf.	vrbae		Lee Adoyta
LD	60	6			radius	distal fragment	Bovidae	cf.	Alcelaphini	cf.	Beatragus	cf.	vrbae		Lee Adoyta
LD	60	9			vertebra		Bovidae	cf.	Alcelaphini	cf.	Beatragus	cf.	vrbae		Lee Adoyta
LD	60	5			rib		Bovidae								Lee Adoyta
LD	61	1			cranial parts with horn core	right horn core, 3 upper molars, braincase fragments	Bovidae		Bovini	cf.	Syncerus				Lee Adoyta
LD	63	1	indet		phalanx	complete	Bovidae								Lee Adoyta
LD	63	2	L		humerus	distal	Bovidae								Lee Adoyta
LD	64	1	L		scapula	proximal	Bovidae								Lee Adoyta
LD	66	1	R	upper	M3		Bovidae		Alcelaphini						Lee Adoyta
LD	67	1	L	upper	M1 or M2		Bovidae		Alcelaphini						Lee Adoyta
LD	70	1	R	upper	molar	fragment	Bovidae		Reduncini						Lee Adoyta
LD	71	1	R		astragalus	complete	Bovidae	cf.	Bovini						Lee Adoyta
LD	72	1	L		horn core	basal	Bovidae		Tragelaphini		Tragelaphus		gaudryi		Lee Adoyta
LD	73	2	R	upper	molar	fragment	Bovidae		Alcelaphini						Lee Adoyta
LD	73	1	L		tibia	proximal	Bovidae								Lee Adoyta
LD	74	1	L		metacarpal	proximal	Bovidae								Lee Adoyta
LD	74	2	R		tibia	distal	Bovidae								Lee Adoyta
LD	74	3	indet		phalanx	complete	Bovidae								Lee Adoyta
LD	75	1	R		calcaneus	proximal	Bovidae								Lee Adoyta
LD	77	2	R		horn core	distal	Bovidae	cf.	Tragelaphini						Lee Adoyta
LD	79	1	L		astragalus	complete	Bovidae								Lee Adoyta
LD	81	1	R		humerus	proximal	Bovidae								Lee Adoyta
LD	82	1	R		Astragalus (a), distal phalanx (b), scapula (c), prox humerus (d)		Bovidae								Lee Adoyta
LD	85	1			horn core	mid	Bovidae	cf.	Aepycerotini						Lee Adoyta
LD	88	1	L	lower	molar	fragment	Bovidae		Alcelaphini						Lee Adoyta
LD	89	1	L	lower	molar	fragment	Bovidae		Alcelaphini						Lee Adoyta
LD	90	1	L		mandible	with m1-m3	Bovidae		Reduncini						Lee Adoyta
LD	92	2	R		scapula	proximal	Bovidae								Lee Adoyta
LD	94	2	L	upper	M3	fragment	Bovidae	cf.	Antilopini						Gurumaha
LD	94	1	R		horn core	midsection near base	Bovidae		Tragelaphini		Tragelaphus		rastafari/nakuae		Gurumaha
LD	95	1	L		astragalus	complete	Bovidae								Gurumaha
LD	97	1	L		horn core	basal with frontlet	Bovidae		Reduncini		Kobus		sigmoidalis		Gurumaha
LD	99	1	L		distal femur (a), prox tibia (c), astragalus (b)		Bovidae								Lee Adoyta
LD	103	1	R		radius	proximal	Bovidae								Gurumaha
LD	105	1	L	lower	m1 or m2		Bovidae		Alcelaphini						Gurumaha
LD	107	1	R?		horn core	basal	Bovidae		?Antilopini	cf.	Antilope				Gurumaha
LD	108	1	L		horn core	basal	Bovidae		Tragelaphini		Tragelaphus		rastafari/nakuae		Gurumaha
LD	110	4			phalanx		Bovidae								Gurumaha
LD	110	3	L		horn core	midsection	Bovidae		Reduncini		Kobus		sigmoidalis		Gurumaha
LD	110	7	R		horn core	basal with frontlet	Bovidae		Reduncini		Kobus		sigmoidalis	Database only goes up to 110-6	Gurumaha
LD	110	1			horn core	midsection	Bovidae								Gurumaha
LD	113	1	L		horn core	basal	Bovidae								Lee Adoyta
LD	114	1	indet		phalanx	complete	Bovidae								Lee Adoyta
LD	116	1	R&L		mandibles	fragmentary, with alveoli but no teeth	Bovidae		Bovini						Lee Adoyta
LD	119	1	R		horn core	basal and midsection (non-conjoining)	Bovidae		Reduncini		Kobus		sigmoidalis		Unknown
LD	127	1			horn core	basal	Bovidae	cf.	Alcelaphini	cf.	Parmularius	aff.	pachyceras		Gurumaha
LD	128	1			horn core	midsection	Bovidae	cf.	Caprini	cf.	Budorcas	cf.	churcheri		Gurumaha
LD	129	1	L		humerus	proximal	Bovidae								Gurumaha
LD	130	1	L		mandible	with m3	Bovidae		Alcelaphini						Gurumaha
LD	131	1			horn core	midsection	Bovidae	cf.	Aepycerotini						Lee Adoyta
LD	137	1			phalanx	proximal	Bovidae	cf.	Bovini						Gurumaha
LD	139	1	R		horn core		Bovidae	cf.	Reduncini						Gurumaha
LD	140	1	R		horn core	midsection	Bovidae		Tragelaphini		Tragelaphus		rastafari/nakuae		Gurumaha
LD	143	1	L		horn core	midsection	Bovidae		Tragelaphini		Tragelaphus		rastafari/nakuae		Gurumaha
LD	145	1	L?		horn core	midsection	Bovidae	cf.	Aepycerotini						Lee Adoyta
LD	147	1	R		cranium with horn core		Bovidae		Tragelaphini		Tragelaphus		rastafari/nakuae		Gurumaha
LD	148	1			horn core	midsection	Bovidae	cf.	Alcelaphini						Gurumaha
LD	148	2	R		horn core	distal	Bovidae		Tragelaphini		Tragelaphus		rastafari/nakuae		Gurumaha
LD	151	1	L		tibia	complete	Bovidae								Lee Adoyta
LD	152	4			tooth	fragment	Bovidae								Gurumaha
LD	153	1			metapodial	distal trochlea frags	Bovidae								Lee Adoyta
LD	155	4	R?		horn core	midsection	Bovidae	cf.	Aepycerotini						Ogoyta
LD	155	3	L	lower	m3	partial	Bovidae	cf.	Hippotragini						Ogoyta
LD	155	2	R	lower	m1 or m2	partial	Bovidae	cf.	Tragelaphini						Ogoyta
LD	156	2	R	lower	m1 or m2		Bovidae		Bovini						Gurumaha
LD	157	1	R		horn core	distal	Bovidae	cf.	Tragelaphini						Gurumaha
LD	158	1			horn core	midsection	Bovidae	cf.	Reduncini						Lee Adoyta
LD	159	2	R	upper	molar	fragment	Bovidae	cf.	Alcelaphini						Gurumaha
LD	159	1	R		tibia	distal	Bovidae								Gurumaha
LD	159	5	R		metacarpal	proximal	Bovidae								Gurumaha
LD	162	7	L	upper	M3	fragment	Bovidae	cf.	Alcelaphini						Ogoyta
LD	162	1			phalanx	diaphysis+distal	Bovidae								Ogoyta
LD	162	11		upper	molar	fragment	Bovidae								Ogoyta
LD	162	12			horn core	fragments	Bovidae								Ogoyta
LD	162	13			molar	fragment	Bovidae								Ogoyta
LD	162	15					Bovidae		Alcelaphini		Connochaetes		gentryi	This skeleton goes with LD 390-1 cranium	Ogoyta
LD	162	14			tooth	fragment	?Bovidae								Ogoyta
LD	164	1	R		femur	proximal	Bovidae								Ogoyta
LD	167	1	L		radius	proximal	Bovidae								Ogoyta
LD	168	1	L		femur	distal	Bovidae								Gurumaha
LD	168	2	R		femur	distal	Bovidae								Gurumaha
LD	170	1	R		horn core	basal	Bovidae	cf.	Reduncini						Ogoyta
LD	171	1	indet		metatarsal	distal	Bovidae								Ogoyta
LD	172	1	R	upper	M1 or M2		Bovidae		Aepycerotini		Aepyceros				Ogoyta
LD	174	1			metacarpal	distal	Bovidae								Ogoyta
LD	175	1	R		femur	distal	Bovidae								Lee Adoyta
LD	177	2			femur	distal	?Bovidae								Gurumaha
LD	178	1	R		metatarsal	distal	Bovidae								Ogoyta
LD	179	1	R		tibia	distal	Bovidae								Gurumaha
LD	181	2			innominate	fragment	?Bovidae								Gurumaha
LD	182	5	L		mandible	with p4	Bovidae		Alcelaphini						Gurumaha
LD	182	1			horn core	distal	Bovidae								Gurumaha
LD	182	3	R	upper	M1 or M2		Bovidae		Reduncini						Gurumaha
LD	182	8	R	lower	m1 or m2		Bovidae		Tragelaphini		Tragelaphus		rastafari/nakuae		Gurumaha
LD	185	1			phalanx	complete	Bovidae								Gurumaha
LD	186	1	L		horn core	midsection	Bovidae		Tragelaphini		Tragelaphus		rastafari/nakuae		Lee Adoyta
LD	187	1			phalanx	complete	Bovidae								Gurumaha
LD	188	1			horn core	midsection	Bovidae								Gurumaha
LD	189	1			tooth	fragments	Bovidae	cf.	Alcelaphini						Lee Adoyta
LD	190	2	R&L		horn core	distal fragments	Bovidae	cf.	Tragelaphini						Gurumaha
LD	191	1			molar	fragment	Bovidae		Alcelaphini						Gurumaha
LD	196	1	R&L		frontals with horn cores	almost complete	Bovidae		Tragelaphini		Tragelaphus		rastafari/nakuae		Gurumaha
LD	198	4			phalanx	complete	Bovidae	cf.	Bovini						Lee Adoyta
LD	198	1			phalanx	complete	Bovidae								Lee Adoyta
LD	198	2	L		metacarpal	proximal + distal frags	Bovidae								Lee Adoyta
LD	198	3			phalanx	proximal, fragment	Bovidae								Lee Adoyta
LD	199	1			humerus		Bovidae								Gurumaha
LD	200	3	L		horn core	midsection	Bovidae	cf.	Aepycerotini						Lee Adoyta
LD	200	1	R		radioulna	proximal	Bovidae								Lee Adoyta
LD	201	1	R	upper	M3		Bovidae		Alcelaphini						Lee Adoyta
LD	202	1			phalanx	fragment	?Bovidae								Gurumaha
LD	203	1			phalanx	proximal	Bovidae								Lee Adoyta
LD	204	1	R		horn core	basal	Bovidae		Aepycerotini		Aepyceros				Lee Adoyta
LD	205	1	R		horn core	distal	Bovidae		Tragelaphini		Tragelaphus		rastafari/nakuae		Lee Adoyta
LD	212	2	R		femur	distal	Bovidae								Lee Adoyta
LD	212	4	L		humerus	distal	Bovidae								Lee Adoyta
LD	212	3			radius?		?Bovidae								Lee Adoyta
LD	214	1	L		scapula	proximal	Bovidae								Lee Adoyta
LD	214	2			humerus	proximal epiphysis	?Bovidae								Lee Adoyta
LD	216	2	R		humerus	distal	Bovidae								Lee Adoyta
LD	216	4	R		calcaneus		Bovidae								Lee Adoyta
LD	217	1	L	lower	molar	fragment	Bovidae		Alcelaphini						Lee Adoyta
LD	218	2		upper	molar	fragment	Bovidae								Lee Adoyta
LD	223	1	L?		horn core	basal	Bovidae		Alcelaphini		Parmularius	aff.	pachyceras		Lee Adoyta
LD	224	1	R		humerus	proximal	Bovidae								Lee Adoyta
LD	227	2	L	upper	M3		Bovidae		Alcelaphini	cf.	Connochaetes				Lee Adoyta
LD	227	1	R		metatarsal	proximal	Bovidae								Lee Adoyta
LD	228	1			pelvis	acetabulum	Bovidae								Lee Adoyta
LD	229	1		upper	molar	fragment	Bovidae	cf.	Alcelaphini						Lee Adoyta
LD	230	1	L		horn core	basal	Bovidae	cf.	Reduncini						Lee Adoyta
LD	231	1	R	upper	M1 or M2		Bovidae		Alcelaphini						Lee Adoyta
LD	232	1		upper	molar	fragment	Bovidae	cf.	Alcelaphini						Lee Adoyta
LD	234	1	R?		horn core	midsection	Bovidae	cf.	Aepycerotini						Lee Adoyta
LD	238	1	L		tibia	distal	Bovidae								Lee Adoyta
LD	239	1	L?		horn core	basal and midsection	Bovidae		Alcelaphini	cf.	Damaliscus				Lee Adoyta
LD	241	1	indet		metatarsal	distal	Bovidae								Lee Adoyta
LD	242	1			horn core	basal and midsection	Bovidae		Alcelaphini	cf.	Connochaetes				Lee Adoyta
LD	242	2	R&L		horn core	basal	Bovidae		Bovini	cf.	Syncerus				Lee Adoyta
LD	245	1			molar	fragments	Bovidae								Lee Adoyta
LD	246	1	L	lower	m3	partial	Bovidae		Alcelaphini						Ogoyta
LD	247	1	L		tibia	distal	Bovidae								Lee Adoyta
LD	249	1	L	lower	mandible	with p4-m1	Bovidae		Reduncini						Lee Adoyta
LD	250	1			horn core	basal	Bovidae	cf.	Alcelaphini						Gurumaha
LD	251	1			horn core	midsection	Bovidae	cf.	Reduncini						Ogoyta
LD	252	1	L		horn core	basal	Bovidae		Aepycerotini		Aepyceros				Lee Adoyta
LD	253	1		upper	molar	fragment	Bovidae								Gurumaha
LD	254	1	L		humerus	proximal	Bovidae								Lee Adoyta
LD	255	1	R		astragalus	complete	Bovidae								Lee Adoyta
LD	256	1	L		humerus	fragments	Bovidae								Lee Adoyta
LD	256	2	L		radius	distal	Bovidae								Lee Adoyta
LD	259	1	L		mandible	with m2-3	Bovidae		Tragelaphini		Tragelaphus		rastafari/nakuae	(also includes equid frag.)	Lee Adoyta
LD	260	1	L		mandible	with m3 frag	Bovidae		Aepycerotini		Aepyceros				Lee Adoyta
LD	263	1	R?		horn core	basal	Bovidae		Alcelaphini	cf.	Damalborea	cf.	sp. A (Geraads et al 2012)		Bulinan
LD	264	1			horn core	basal fragment	Bovidae								Gurumaha
LD	265	1	R		humerus	distal	Bovidae								Gurumaha
LD	266	1	R		femur	distal	Bovidae								Gurumaha
LD	266	2			horn core	distal	Bovidae		Reduncini		Kobus		sigmoidalis		Gurumaha
LD	267	2	L		horn core	midsection	Bovidae		Aepycerotini		Aepyceros				Gurumaha
LD	267	1	R		horn core	basal	Bovidae		Reduncini		Kobus		sigmoidalis		Gurumaha
LD	268	1	R	upper	M1 or M2		Bovidae		Alcelaphini						Gurumaha
LD	269	1	L		mandible	with m3 frag	Bovidae	cf.	Aepycerotini						Gurumaha
LD	269	2		lower	molar	fragment	Bovidae		Alcelaphini						Gurumaha
LD	272	2			vertebra		Bovidae								Gurumaha
LD	274	1		lower	m1 or m2	fragment	Bovidae		Bovini						Gurumaha
LD	278	2			astragalus	complete	Bovidae								Gurumaha
LD	278	1	L	upper	M1 or M2		Bovidae		Reduncini						Gurumaha
LD	279	1			horn core	distal	Bovidae								Lee Adoyta
LD	281	2			molar	fragment	Bovidae								Gurumaha
LD	282	1	R	upper	P4		Bovidae	cf.	Bovini						Gurumaha
LD	283	1			horn core	midsection	Bovidae	cf.	Aepycerotini						Gurumaha
LD	283	2	R	lower	m1 or m2		Bovidae		Reduncini						Gurumaha
LD	285	3	R&L		horn cores with conjoined frontals		Bovidae		Bovini		Ugandax		coryndonae		Gurumaha
LD	285	1			horn core	midsection	Bovidae	cf.	Reduncini						Gurumaha
LD	285	2			horn core	midsection	Bovidae	cf.	Reduncini						Gurumaha
LD	286	2	indet		dist metacarpal, prox phalanges		Bovidae								Gurumaha
LD	286	1	R		M1 or M2		Bovidae	cf.	Reduncini						Gurumaha
LD	288	1	R		mandible	with m1 or m2	Bovidae								Gurumaha
LD	290	1	R	lower	mandible	frag w dp4 and part m1	Bovidae	cf.	Bovini						Gurumaha
LD	291	1			phalanx	proximal	Bovidae	cf.	Bovini						Gurumaha
LD	292	1	R		mandible	with m3	Bovidae								Gurumaha
LD	293	1	L		mandible	with m1	Bovidae		Reduncini						Gurumaha
LD	295	1	R		humerus	proximal	Bovidae								Gurumaha
LD	295	2	R		mandible	fragment, no teeth	Bovidae								Gurumaha
LD	295	3	L		metacarpal	proximal	Bovidae								Gurumaha
LD	295	4	R		scapula	proximal	Bovidae								Gurumaha
LD	295	5	L		humerus	proximal	Bovidae								Gurumaha
LD	296	1	L		femur	proximal, juvenile	Bovidae								Gurumaha
LD	301	2	L		scapula	proximal	Bovidae								Garsa-lu/TBD
LD	301	4			carpal (indet.)		Bovidae								Ogoyta
LD	302	2	L		horn core	basal and distal fragments (non-conjoining)	Bovidae		Alcelaphini						Gurumaha
LD	302	6			horn core	fragment	Bovidae		Alcelaphini						Gurumaha
LD	302	7	R?		horn core	basal	Bovidae		Bovini					Ugandax?	Gurumaha
LD	302	8	R	lower	m1 or m2		Bovidae		Bovini						Gurumaha
LD	302	3	R		tibia	distal	Bovidae								Gurumaha
LD	302	4	L		radius	proximal	Bovidae								Gurumaha
LD	302	18			tooth	fragment	Bovidae								Gurumaha
LD	302	20			molar	fragment	Bovidae								Gurumaha
LD	303	6	L		horn core	midsection	Bovidae	cf.	Aepycerotini						Gurumaha
LD	304	3			horn core	basal	Bovidae	cf.	Alcelaphini						Gurumaha
LD	304	13			horn core	midsection	Bovidae	cf.	Alcelaphini	cf.	Damaliscus				Gurumaha
LD	304	5			horn core	basal	Bovidae	cf.	Bovini						Gurumaha
LD	304	48	L	lower	p3 or p4	fragment	Bovidae		Bovini						Gurumaha
LD	304	6	R		astragalus	complete	Bovidae								Gurumaha
LD	304	8			phalanx	intermediate	Bovidae								Gurumaha
LD	304	9	R		radius	proximal	Bovidae								Gurumaha
LD	304	11	R	lower	incisor		Bovidae								Gurumaha
LD	304	37			horn core	fragment	Bovidae								Gurumaha
LD	304	53			tooth	fragment	Bovidae								Gurumaha
LD	304	67	L	lower	m1 or m2		Bovidae		Reduncini						Gurumaha
LD	304	44		upper	molar	fragment	Bovidae		Tragelaphini		Tragelaphus		rastafari/nakuae		Gurumaha
LD	305	4	L		horn core	midsection	Bovidae		Aepycerotini		Aepyceros				Gurumaha
LD	305	7	R?		horn core	midsection	Bovidae	cf.	Aepycerotini						Gurumaha
LD	305	5	R		mandible	with m2 frag, m3	Bovidae		Alcelaphini						Gurumaha
LD	305	6			horn core	two midsections	Bovidae	cf.	Alcelaphini						Gurumaha
LD	305	20			molar	fragment	Bovidae		Alcelaphini						Gurumaha
LD	306	10			cranial partial	braincase	Bovidae	cf.	Aepycerotini						Gurumaha
LD	306	2	indet		metatarsal	distal	Bovidae								Gurumaha
LD	306	7	L		tibia	proximal	Bovidae								Gurumaha
LD	306	8	R		tibia	distal	Bovidae								Gurumaha
LD	307	1	R		mandible	with p4-m2	Bovidae		Alcelaphini						Gurumaha
LD	308	3	R	lower	m1 or m2		Bovidae		Alcelaphini						Gurumaha
LD	308	9		lower	molar	fragment	Bovidae		Alcelaphini						Gurumaha
LD	308	2		upper	molar	fragment	Bovidae								Gurumaha
LD	308	4	R	lower	dp4 partial	partial	Bovidae								Gurumaha
LD	308	11			tooth	fragment	Bovidae								Gurumaha
LD	309	1			molar	fragments	Bovidae								Gurumaha
LD	310	2	indet		metacarpal		Bovidae								Gurumaha
LD	311	2			horn core	midsection very close to base	Bovidae		Alcelaphini	cf.	Damaliscus				Gurumaha
LD	314	31	R		horn core	proximal	Bovidae	cf.	Aepycerotini						Gurumaha
LD	314	25			molar	fragment	Bovidae		Alcelaphini						Gurumaha
LD	314	29	L	upper	P3		Bovidae		Alcelaphini						Gurumaha
LD	314	3	R		metacarpal	proximal	Bovidae								Gurumaha
LD	315	1			scapula	proximal	Bovidae								Gurumaha
LD	315	10	R	upper	molar	fragment	Bovidae		Reduncini						Gurumaha
LD	317	1	R		femur	distal	Bovidae								Lee Adoyta
LD	318	1	L		horn core	basal	Bovidae	cf.	Alcelaphini						Gurumaha
LD	318	6			tooth	fragment	Bovidae								Gurumaha
LD	319	1	R		femur	distal	Bovidae								Gurumaha
LD	319	3	R		femur	proximal	Bovidae								Gurumaha
LD	320	1	R	lower	molar	fragment	Bovidae		Alcelaphini						Gurumaha
LD	321	1	L		radius	distal	Bovidae								Gurumaha
LD	323	1	L		horn core	midsection	Bovidae	cf.	Aepycerotini						Lee Adoyta
LD	324	5	L		astragalus		Bovidae	cf.	Bovini						Gurumaha
LD	324	6			horn cores	two midsections	Bovidae		Reduncini		Kobus		sigmoidalis		Lee Adoyta
LD	324	1	R?		?horn core	basal	?Bovidae								Ogoyta
LD	324	4					?Bovidae								Ogoyta
LD	325	1		upper	molar	fragment	Bovidae	cf.	Alcelaphini						Lee Adoyta
LD	325	2	R	upper	M1 or M2		Bovidae		Alcelaphini						Lee Adoyta
LD	330	1	L	upper	M3		Bovidae		Alcelaphini						Ogoyta
LD	331	1	L	lower	molar	fragment	Bovidae		Alcelaphini						Lee Adoyta
LD	332	1	L	upper	M1 or M2		Bovidae		Alcelaphini						Gurumaha
LD	333	4	R		tibia	distal	Bovidae								Lee Adoyta
LD	335	2	R	lower	m1 or m2	fragment	Bovidae		Reduncini						Gurumaha
LD	336	1	L		frontlet with basal horn core frag		Bovidae		Alcelaphini	cf.	Damalborea	cf.	sp. A (Geraads et al 2012)		Gurumaha
LD	336	2	L		mandible	with m3	Bovidae		Alcelaphini						Gurumaha
LD	337	1	L?		horn core	midsection	Bovidae	cf.	Aepycerotini						Gurumaha
LD	338	1			molar	fragment	Bovidae		Alcelaphini						Gurumaha
LD	340	1	L		radius	proximal	Bovidae								Gurumaha
LD	341	1	indet		metatarsal	distal	Bovidae								Gurumaha
LD	341	2	L		horn core	basal	Bovidae		Tragelaphini		Tragelaphus		rastafari/nakuae		Gurumaha
LD	341	3	L	lower	p4		Bovidae		Tragelaphini		Tragelaphus		gaudryi		Gurumaha
LD	342	1			horn core	midsection	Bovidae	cf.	Reduncini						Gurumaha
LD	346	8			horn core	midsection	Bovidae	cf.	Aepycerotini						Gurumaha
LD	346	11			horn core	midsection	Bovidae								Gurumaha
LD	346	2			horn core	midsection	Bovidae	cf.	Reduncini	cf.	Kobus	cf.	sigmoidalis		Gurumaha
LD	346	5	R	lower	molar	fragment	Bovidae		Tragelaphini		Tragelaphus		rastafari/nakuae		Gurumaha
LD	347	1		upper	molar	fragment	Bovidae		Alcelaphini						Gurumaha
LD	349	1			horn core	midsection	Bovidae	cf.	Reduncini						Gurumaha
LD	350	10	R		horn core	basal	Bovidae		Aepycerotini		Aepyceros				Gurumaha
LD	350	2	R	lower	molar	fragment	Bovidae		Alcelaphini						Gurumaha
LD	350	25	L	lower	m3	fragment	Bovidae	cf.	Alcelaphini						Gurumaha
LD	350	7			tooth	fragment	Bovidae								Gurumaha
LD	351	1	R	lower	m1 or m2		Bovidae		Alcelaphini						Gurumaha
LD	352	1	L		humerus	distal	Bovidae								Ogoyta
LD	353	2	R		mandible	with p4 frag	Bovidae		Alcelaphini	cf.	Connochaetes				Gurumaha
LD	353	3		upper	molar	fragment	Bovidae		Alcelaphini						Lee Adoyta
LD	353	1	R		mandible	with p4	Bovidae								Gurumaha
LD	355	1	L		mandible	with m1-m2	Bovidae		Alcelaphini						Gurumaha
LD	356	1	R	upper	M1 or M2		Bovidae		Alcelaphini						Gurumaha
LD	357	1			phalanx	proximal	Bovidae								Gurumaha
LD	358	1	R		mandible	with two molar frags	Bovidae		Alcelaphini						Gurumaha
LD	359	1	R		horn core	basal with frontlet	Bovidae		?Antilopini	cf.	Parantidorcas	cf.	latifrons		Gurumaha
LD	365	1		upper	molar	fragment	Bovidae	cf.	Alcelaphini						Gurumaha
LD	366	1	R		humerus	distal	Bovidae								Gurumaha
LD	367	1		lower	molar	fragment	Bovidae		Alcelaphini						Lee Adoyta
LD	368	1	R		horn core	basal with frontlet	Bovidae		Alcelaphini	cf.	Damalborea	cf.	sp. A (Geraads et al 2012)		Gurumaha
LD	370	8			horn core	fragment	Bovidae								Gurumaha
LD	372	1			tooth	fragment	Bovidae								Lee Adoyta
LD	373	1		upper	molar	fragment	Bovidae	cf.	Alcelaphini						Lee Adoyta
LD	374	1	L		metatarsal	proximal	Bovidae								Gurumaha
LD	375	1	L	lower	mandible	with maxillary fragment	Bovidae		Reduncini						Ogoyta
LD	377	1	L	lower	m1 or m2		Bovidae		Reduncini						Gurumaha
LD	378	1			horn core	basal	Bovidae	cf.	Alcelaphini						Ogoyta
LD	380	1	L	lower	m3	partial	Bovidae		Alcelaphini						Gurumaha
LD	381	1	L		horn core	basal	Bovidae		Reduncini		Kobus		sigmoidalis		Gurumaha
LD	382	2	R	upper	M1 or M2		Bovidae		Alcelaphini						Gurumaha
LD	382	3	R	lower	m1 or m2		Bovidae		Alcelaphini						Gurumaha
LD	382	1	L	lower	p4, m2, m3		Bovidae		Reduncini						Gurumaha
LD	384	1			horn core	basal	Bovidae	cf.	Alcelaphini						Lee Adoyta
LD	385	1	L	upper	M1 and M3		Bovidae		Alcelaphini						Gurumaha
LD	386	1	R		horn core	distal	Bovidae	cf.	Tragelaphini						Gurumaha
LD	387	1	R?		horn core	basal	Bovidae		Reduncini		Kobus		sigmoidalis		Gurumaha
LD	387	2	R?		horn core	many fragments non-conjoining	Bovidae	cf.	Reduncini						Gurumaha
LD	388	1	R	lower	m1 or m2		Bovidae		Aepycerotini		Aepyceros				Gurumaha
LD	388	2			horn core	fragment	Bovidae								Gurumaha
LD	389	1			horn core	midsection	Bovidae	cf.	Aepycerotini						Gurumaha
LD	390	1			skull and partial skeleton	fairly complete	Bovidae		Alcelaphini		Connochaetes		gentryi		Ogoyta
LD	392	1			molar	fragment	Bovidae		Bovini						Gurumaha
LD	393	3	L	lower	mandible molar fragments		Bovidae		Alcelaphini						Gurumaha
LD	395	4			tooth	fragment	Bovidae								Gurumaha
LD	413	2			horn core	fragment	Bovidae								Gurumaha
LD	424	3			tooth	fragment	Bovidae								Gurumaha
LD	437	1		lower	molar	fragment	Bovidae		Reduncini						Gurumaha
LD	439	9			tooth	fragment	Bovidae								Gurumaha
LD	445	3			tooth	fragment	Bovidae								Gurumaha
LD	447	5	L	lower	m3		Bovidae		Reduncini						Gurumaha
LD	450	1	L		horn core	distal fragment	Bovidae		Tragelaphini		Tragelaphus		rastafari/nakuae		Gurumaha
LD	455	2	L	lower	m3		Bovidae	cf.	Alcelaphini						Gurumaha
LD	458	1			horn core	midsection	Bovidae								Gurumaha
LD	459	1			horn core	fragment	Bovidae								Gurumaha
LD	460	2	L	upper	M3		Bovidae		Aepycerotini		Aepyceros				Gurumaha
LD	474	1	R	lower	mandible m3 fragment		Bovidae		Alcelaphini						Gurumaha
LD	477	2	L	lower	m3		Bovidae		Alcelaphini						Gurumaha
LD	478	2	R	lower	m3	partial	Bovidae		Alcelaphini						Gurumaha
LD	483	7	L	lower	m1 or m2	partial	Bovidae		Alcelaphini						Gurumaha
LD	483	3	L	upper	M2		Bovidae		Bovini						Gurumaha
LD	483	1	R	lower	m3	partial	Bovidae		Reduncini						Gurumaha
LD	483	2	R	lower	molar	fragment	Bovidae		Reduncini						Gurumaha
LD	483	8	L	upper	M1		Bovidae		Tragelaphini		Tragelaphus		rastafari/nakuae		Gurumaha
LD	483	10		upper	molar	fragment	Bovidae		Tragelaphini		Tragelaphus		rastafari/nakuae		Gurumaha
LD	486	2			horn core	fragment	Bovidae								Gurumaha
LD	486	1			horn core	fragment	Bovidae	cf.	Reduncini	cf.	Kobus				Gurumaha
LD	487	1		lower	mandible m1		Bovidae		Reduncini						Gurumaha
LD	488	1			molar	fragment	Bovidae		Alcelaphini						Gurumaha
LD	489	1			horn core	fragment	Bovidae								Gurumaha
LD	489	2	R	lower	m1		Bovidae		Tragelaphini		Tragelaphus		rastafari/nakuae		Gurumaha
LD	497	1	L		horn core	distal	Bovidae	cf.	Aepycerotini						Gurumaha
LD	498	1			horn core	fragment	Bovidae								Gurumaha
LD	499	3		lower	molar	fragment	Bovidae		Alcelaphini						Gurumaha
LD	499	1		upper	molar	fragment	Bovidae								Gurumaha
LD	503	1	L		horn core	midsection	Bovidae		Tragelaphini		Tragelaphus		gaudryi		Gurumaha
LD	504	1			horn core	midsection	Bovidae								Gurumaha
LD	506	1	R	upper	M1 or 2		Bovidae		Alcelaphini						Bulinan
LD	508	1	R	lower	m1 or m2		Bovidae		Alcelaphini						Gurumaha
LD	509	1	R	upper	Maxilla	fragment M2-3	Bovidae		Bovini						Gurumaha
LD	519	4			tooth	fragment	Bovidae	cf.	Alcelaphini						Lee Adoyta
LD	522	1			horn core	fragment	Bovidae								Lee Adoyta
LD	528	1			horn core?	fragment	?Bovidae								Lee Adoyta
LD	533	1	R	upper	molar	fragment	Bovidae		Bovini						Lee Adoyta
LD	544	1	L	upper	M1-3	fragments	Bovidae	cf.	Reduncini						Lee Adoyta
LD	550	1	L		horn core		Bovidae		Aepycerotini		Aepyceros				Lee Adoyta
LD	558	2	R	upper	molar	fragment	Bovidae	cf.	Alcelaphini						Lee Adoyta
LD	559	1			horn core?	fragment	?Bovidae								Lee Adoyta
LD	560	1	L	upper	molar	fragment	Bovidae		Bovini						Lee Adoyta
LD	574	1	L	lower	mandible p4-m3		Bovidae		Bovini						Lee Adoyta
LD	584	1			horn core	distal	Bovidae		Reduncini		Kobus		sigmoidalis		Lee Adoyta
LD	591	1	L	upper	M1 or M2	fragment	Bovidae		Aepycerotini		Aepyceros				Lee Adoyta
LD	592	1			horn core	midsection	Bovidae	cf.	Bovini	cf.	Ugandax	cf.	coryndonae		Lee Adoyta
LD	593	1	L	upper	M3		Bovidae		Alcelaphini						Ogoyta
LD	598	1			horn core	midsection	Bovidae	cf.	Aepycerotini						Ogoyta
LD	600	1			horn core	fragment	Bovidae								Ogoyta
LD	604	1	L	lower	mandible	fragment m1-3	Bovidae		Tragelaphini		Tragelaphus		gaudryi		Gurumaha
LD	609	1			molar	fragment	Bovidae		Alcelaphini						Ogoyta
LD	610	1	L	lower	m3		Bovidae	cf.	Aepycerotini					small	Ogoyta
LD	616	1	R	lower	p4		Bovidae		Alcelaphini						Lee Adoyta
LD	624	1	R		horn core	distal	Bovidae	cf.	Aepycerotini						Gurumaha
LD	628	1		upper	molar	fragment	Bovidae								Ogoyta
LD	636	1			horn core	basal	Bovidae		Aepycerotini		Aepyceros				Ogoyta
LD	638	2			horn core	midsection	Bovidae	cf.	Aepycerotini						Gurumaha
LD	638	3			horn core	midsection	Bovidae	cf.	Aepycerotini						Gurumaha
LD	638	4			horn core	fragment	Bovidae								Gurumaha
LD	640	1			horn core	fragment	Bovidae								Gurumaha
LD	644	1	R	upper	M2 or M3		Bovidae	cf.	Alcelaphini						Gurumaha
LD	646	1	L	lower	p3		Bovidae		Tragelaphini		Tragelaphus		rastafari/nakuae		Gurumaha
LD	647	1	R	lower	m3		Bovidae	cf.	Alcelaphini						Gurumaha
LD	654	26			tooth	fragments	Bovidae								Gurumaha
LD	654	2			molar	fragment	Bovidae	cf.	Tragelaphini	cf.	Tragelaphus	cf.	rastafari/nakuae		Gurumaha
LD	659	1	R		horn core	basal	Bovidae		Reduncini	cf.	Menelikia	cf.	lyrocera		Gurumaha
LD	660	1	L	upper	M1 or dP4		Bovidae	cf.	Reduncini						Gurumaha
LD	661	2	L		horn core	basal	Bovidae		Reduncini	cf.	Menelikia	cf.	lyrocera		Gurumaha
LD	663	1			horn core	basal	Bovidae								Gurumaha
LD	665	1	R	lower	mandible tooth fragments		Bovidae								Ogoyta
LD	668	3			tooth	fragment	Bovidae								Gurumaha
LD	668	7	R		horn core	basal	Bovidae		Tragelaphini		Tragelaphus		gaudryi		Gurumaha
LD	669	1	L		horn core	basal	Bovidae		Aepycerotini		Aepyceros				Gurumaha
LD	671	3	R	lower	mandible p3-4		Bovidae		Alcelaphini						Gurumaha
LD	671	1			horn core	midsection	Bovidae								Gurumaha
LD	681	1	L	upper	M3		Bovidae	cf.	Alcelaphini						Gurumaha
LD	683	1			tooth	fragment	Bovidae	cf.	Tragelaphini						Gurumaha
LD	689	1	R	lower	m3	partial	Bovidae		Alcelaphini						Gurumaha
LD	693	1	L	lower	m1 or m2		Bovidae	cf.	Alcelaphini						Gurumaha
LD	695	1		upper	molar	fragment	Bovidae		Alcelaphini						Gurumaha
LD	697	1			horn core	fragments	Bovidae	cf.	Alcelaphini	cf.	Beatragus	cf.	vrbae		Gurumaha
LD	698	1	L	upper	M1 or M2		Bovidae		Bovini						Gurumaha
LD	702	1	R	upper	M3		Bovidae		Tragelaphini		Tragelaphus		rastafari/nakuae		Gurumaha
LD	703	2	R		horn core	basal	Bovidae		Aepycerotini		Aepyceros				Gurumaha
LD	706	11			tooth	fragment	Bovidae								Gurumaha
LD	706	17			tooth	fragment	Bovidae								Gurumaha
LD	707	5			molar	fragment	Bovidae		Alcelaphini						Gurumaha
LD	707	1			horn core	fragment	Bovidae								Gurumaha
LD	707	4	L		horn core	basal	Bovidae		Reduncini		Kobus		sigmoidalis		Gurumaha
LD	708	1	R		horn core	basal	Bovidae		Reduncini		Kobus		sigmoidalis		Gurumaha
LD	709	1	R	lower	molar	fragment	Bovidae		Bovini						Gurumaha
LD	710	1			molar	fragment	Bovidae		Alcelaphini						Gurumaha
LD	712	1	L	lower	m3	partial	Bovidae	cf.	Reduncini	cf.	Kobus				Gurumaha
LD	714	1			tooth	fragment	Bovidae								Gurumaha
LD	715	1			tooth	fragment	Bovidae								Gurumaha
LD	717	1	L	upper	M2 or M3		Bovidae	cf.	Antilopini						Gurumaha

## Sheet: Table 2S HC measurements
Prefix	Site	Number	Tribe	Genus-Species	AP	T	Note
LD	34	2	?Antilopini	? Gazella	13.6	10.9
LD	107	1	?Antilopini	?Antilope	46c	38e
LD	263	1	Alcelaphini	?Damalborea	33	32.7
LD	336	1	Alcelaphini	?Damalborea	51e	45e	very rough estimate
LD	368	1	Alcelaphini	?Damalborea	43.9	41.5
LD	239	1	Alcelaphini	?Damaliscus	32.6	26.5
LD	311	2	Alcelaphini	?Damaliscus	46.9	36.7c
LD	359	1	?Antilopini	?Parantidorcas latifrons	35.3	25.4
LD	242	2	Bovini	?Syncerus	84.5	77.8
LD	54	1	Aepycerotini	Aepyceros sp.	30c	29c
LD	204	1	Aepycerotini	Aepyceros sp.	39.7	37
LD	252	1	Aepycerotini	Aepyceros sp.	32c	32c
LD	267	2	Aepycerotini	Aepyceros sp.	31.7+	32.4+	measured above base
LD	305	4	Aepycerotini	Aepyceros sp.	30.7+	25.3+	measured above base
LD	314	31	Aepycerotini	Aepyceros sp.	34.0+	25.2+	measured above base
LD	350	1	Aepycerotini	Aepyceros sp.	35.8	34.7
LD	550	1	Aepycerotini	Aepyceros sp.	41.9	35.2
LD	636	1	Aepycerotini	Aepyceros sp.	39.4	35.3
LD	636	1	Aepycerotini	Aepyceros sp.	39.4	35.3
LD	669	1	Aepycerotini	Aepyceros sp.	34.2	31.2
LD	703	2	Aepycerotini	Aepyceros sp.	33	28.7
LD	61	1	Bovini	cf. Syncerus	83	75.3	400+ mm length
LD	97	1	Reduncini	Kobus sigmoidalis	51.1	42
LD	110	7	Reduncini	Kobus sigmoidalis	44.5	37.2
LD	119	1	Reduncini	Kobus sigmoidalis	55.5	42.4
LD	267	1	Reduncini	Kobus sigmoidalis	43.6+	34.5+	measured above base
LD	381	1	Reduncini	Kobus sigmoidalis	54.3	43
LD	387	1	Reduncini	Kobus sigmoidalis	48.5	39.6
LD	659	1	Reduncini	cf. Menelikia lyrocera	60.4	51.1
LD	661	2	Reduncini	cf. Menelikia lyrocera	62.8	49.1
LD	223	1	Alcelaphini	Parmularius cf. pachyceras	64.9	49
LD	72	1	Tragelaphini	T. gaudryi	45.5	36.4
LD	668	7	Tragelaphini	T. gaudryi	53.8	39.3
A.L.	70	12	Tragelaphini	T. rastafari / nakuae	51.7	76.1
LD	147	1	Tragelaphini	T. rastafari / nakuae	50.8	76.2
LD	196	1	Tragelaphini	T. rastafari / nakuae	49.9 L, 50.3 R	58.1 L, 61.2 R

## Sheet: Table 3S Tooth Metrics
Prefix	Site	Number	Side	U.L	Tooth.position	AP	T	Ht	Wear	Tribe.qualifier	Tribe	Genus.qualifier	Genus	Species.qualifier	Species
LD	388	1	R	L	m1 or m2	18.2	8.5	31.2	almost unworn		Aepycerotini		Aepyceros
LD	172	1	R	U	M1 or M2	16.7	11.6	34.1	unworn		Aepycerotini		Aepyceros
LD	591	1	L	U	M1 or M2	15.4	na				Aepycerotini		Aepyceros
A.L.	87	1	R	L	m3	23.9	8.2	26.5+	early mid wear		Aepycerotini		Aepyceros
LD	269	1	L	L	m3	23.1	8.2			cf.	Aepycerotini
LD	610	1	L	L	m3	21.1	9.2	35.5	almost unworn	cf.	Aepycerotini
LD	460	2	L	U	M3	16.4	11.8				Aepycerotini		Aepyceros
A.L.	72	12	R	L	m1	15.8	11.9				Alcelaphini
LD	25	5	R	L	m1	22.1	11.1	36.9	late early wear		Alcelaphini	cf.	Connochaetes
LD	307	1	R	L	m1	17.5	10.9				Alcelaphini
LD	355	1	L	L	m1	20.5	10.5				Alcelaphini
LD	390	1	R	L	m1	20.5	-				Alcelaphini		Connochaetes		gentryi
LD	390	1	R	U	M1	18.9	18c		mid late wear		Alcelaphini		Connochaetes		gentryi
LD	483	7	L	L	m1 or 2 frag	19c	na				Alcelaphini
LD	105	1	L	L	m1 or m2	23.1	11.1	44	early early wear		Alcelaphini
LD	308	3	R	L	m1 or m2	26e	14e	37e			Alcelaphini
LD	351	1	R	L	m1 or m2	23.3	13.3				Alcelaphini
LD	358	1	R	L	m1 or m2	22e	10.19				Alcelaphini
LD	382	3	R	L	m1 or m2	19.1	12e				Alcelaphini
LD	508	1	R	L	m1 or m2	24.7	11.6	51e	early wear		Alcelaphini
LD	12	1	L	U	M1 or M2	29e	-				Alcelaphini
LD	231	1	R	U	M1 or M2	26.8	20e	55+ (59e)	mid early wear		Alcelaphini
LD	268	1	R	U	M1 or M2	26e	20e				Alcelaphini
LD	325	2	R	U	M1 or M2	17.3	10.7				Alcelaphini
LD	332	1	L	U	M1 or M2	21.8	15.8				Alcelaphini
LD	356	1	R	U	M1 or M2	24.3	17.9				Alcelaphini
LD	382	2	R	U	M1 or M2	24.5	17.4				Alcelaphini
LD	67	1	R	U	M1 or M2	17.1	14.2				Alcelaphini
A.L.	72	12	R	L	m1-3	73.8					Alcelaphini
LD	390	1	R	L	m1-3	82.2	-				Alcelaphini		Connochaetes		gentryi
LD	390	1	R	U	M1-3	72.6					Alcelaphini		Connochaetes		gentryi
A.L.	72	12	R	L	m2	22.9	12.9				Alcelaphini
A.L.	94	3	R	L	m2	20.3	10.2				Alcelaphini
LD	307	1	R	L	m2	20.3	11	34.1+	early mid wear		Alcelaphini
LD	355	1	L	L	m2	23.2	11.3	42.3	unworn (erupting)		Alcelaphini
LD	390	1	R	L	m2	24.7	-				Alcelaphini		Connochaetes		gentryi
LD	390	1	R	U	M2	25.9	20.1		late mid wear		Alcelaphini		Connochaetes		gentryi
LD	644	1	R	U	M2 or 3	16.5c	10.8			cf.	Alcelaphini
LD	358	1		L	m2 or m3 frag	-	6.82				Alcelaphini
LD	393	3	L	L	m2 or m3 frag	na	12.2	51.6	almost unworn		Alcelaphini
A.L.	72	12	R	L	m3	32.3	12.8	32.0+	mid wear		Alcelaphini
A.L.	94	3	R	L	m3	26+	8.6+		unworn (erupting)		Alcelaphini
LD	130	1	L	L	m3	30.6	12.1	42 (46e)	late early wear		Alcelaphini
LD	305	5	R	L	m3	28.6	12.1				Alcelaphini
LD	336	2	L	L	m3	29.5	11.2				Alcelaphini
LD	390	1	R	L	m3	36.9	-				Alcelaphini		Connochaetes		gentryi
LD	201	1	R	U	M3	26.8	16e				Alcelaphini
LD	227	2	L	U	M3	32.7	20.5	54	late early wear		Alcelaphini	cf.	Connochaetes
LD	330	1	L	U	M3	28.4	16.6	46.9+	late early wear		Alcelaphini
LD	385	1	L	U	M3	24.5	16.1				Alcelaphini
LD	390	1	R	U	M3	27	19.8		mid mid wear		Alcelaphini		Connochaetes		gentryi
LD	593	1	L	U	M3	23.5	17.1				Alcelaphini
LD	66	1	R	U	M3	22.3	18e				Alcelaphini
A.L.	71	1	R	L	m3 frag	28.5e	11.9	51.1	early early wear		Alcelaphini
A.L.	87	3	L	L	m3 frag	30e	11.9	56.1	late early wear		Alcelaphini
LD	246	1	L	L	m3 frag	29e	12.6	52.8	almost unworn		Alcelaphini
LD	474	1	R	L	m3 frag	na	10.6	52.5	early wear		Alcelaphini
LD	477	2	L	L	m3 frag	na	10.9	51e	early wear		Alcelaphini
LD	478	2	R	L	m3 frag	na	11.7	53e	early early wear		Alcelaphini
LD	689	1	R	L	m3 frag	30.6	na	48.5e	early wear		Alcelaphini
LD	390	1	R	U	P2	10.3	11c				Alcelaphini		Connochaetes		gentryi
LD	390	1	R	U	P2-4	41.4					Alcelaphini		Connochaetes		gentryi
LD	390	1	R	L	p3	12.5					Alcelaphini		Connochaetes		gentryi
LD	671	3	R	L	p3	11.7	7.8				Alcelaphini
LD	314	29	L	U	P3	11.7	11.9				Alcelaphini
LD	390	1	R	U	P3	14.9	13c		mid wear		Alcelaphini		Connochaetes		gentryi
LD	353	2	R	L	p3 alv	10.6e	7.1e				Alcelaphini	cf.	Connochaetes
LD	390	1	R	L	p3-4	29.3					Alcelaphini		Connochaetes		gentryi
A.L.	72	12	R	L	p4	13.9	9.6				Alcelaphini
LD	182	5	L	L	p4	13.9	8.8				Alcelaphini
LD	307	1	R	L	p4	14	8.8				Alcelaphini
LD	390	1	R	L	p4	16					Alcelaphini		Connochaetes		gentryi
LD	616	1	R	L	p4	15.6	7.7				Alcelaphini
LD	671	3	R	L	p4	13.5	9.4				Alcelaphini
LD	390	1	R	U	P4	14.4	13.4c		mid wear		Alcelaphini		Connochaetes		gentryi
LD	353	2	R	L	p4 frag	15.8	c8.4				Alcelaphini	cf.	Connochaetes
LD	717	1	U	L	M2 or 3					cf.	Antilopini
LD	94	2	L	U	M3 frag	17	na			cf.	Antilopini
LD	290	1	R	L	dp4	28	12.7			cf.	Bovini
LD	709	1	R	L	m frag	27e	na				Bovini
LD	533	1	R	U	M frag	34e	na				Bovini
LD	560	1	L	U	M frag	28.7c	na				Bovini
LD	116	1	L	L	m1	24.8e	17.1e				Bovini
LD	574	1	L	L	m1 frag	31e	na				Bovini
LD	156	2	R	L	m1 or m2	27.8	14.2				Bovini
LD	302	8	R	L	m1 or m2	25.2	15.5				Bovini
LD	698	1	L	U	M1 or M2	28.5e	26.7				Bovini
LD	61	1	R	U	M1 or M2 frag	23e	22e				Bovini	cf.	Syncerus
LD	116	1	L	L	m1-3	99e					Bovini
LD	116	1	L	L	m2	26.5e	20.8e				Bovini
LD	574	1	L	L	m2	33.5	15.4				Bovini
LD	483	3	L	U	M2	30.7	23.3				Bovini
LD	509	1	R	U	M2	27.6	24.4				Bovini
LD	61	1	L	U	M2 or M3	30.9	25.4	24.4+	mid wear		Bovini	cf.	Syncerus
LD	61	1	R	U	M2 or M3 frag	30.7	18.3+				Bovini	cf.	Syncerus
LD	116	1	L	L	m3	44e	17.5e				Bovini
LD	574	1	L	L	m3	39	15	50	almost unworn		Bovini
LD	509	1	R	U	M3	29.1	20.5				Bovini
LD	116	1	L	L	p2	14.2e	11.8e				Bovini
LD	116	1	L	L	p2-4	58.8e					Bovini
LD	116	1	L	L	p3	17.8e	10.1e				Bovini
LD	32	1	L	L	p3 or p4	21.25	13.72				Bovini
LD	304	48	L	L	p3 or p4	na	13+				Bovini
LD	116	1	L	L	p4	22.2e	14.2e				Bovini
LD	574	1	L	L	p4	23e	13.8				Bovini
LD	282	1	R	U	P4	16.9	12.5			cf.	Bovini
LD	155	3	L	L	m3 frag	-	13e			cf.	Hippotragini
LD	660	1	L	U	dP4 or M1	12.9	13.5e			cf.	Reduncini
LD	483	2	R	L	m frag	na	12.8				Reduncini
LD	315	10	R	U	M frag	18e	na				Reduncini
LD	70	1	R	U	M frag	19e	-				Reduncini
LD	249	1	L	L	m1	16.6	10.1				Reduncini
LD	293	1	L	L	m1	14.1	10.2				Reduncini
LD	487	1	R	L	m1	17	8.5				Reduncini
LD	90	1	L	L	m1	14.88	8.92				Reduncini
LD	544	1	L	U	M1	17.5e	na			cf.	Reduncini
LD	283	2	R	L	m1 or m2	17.8	10.3	29.2	almost unworn		Reduncini
LD	304	67	L	L	m1 or m2	13.8	8.9				Reduncini
LD	304	67	L	L	m1 or m2	13.8	8.9				Reduncini
LD	377	1	L	L	m1 or m2	18.5	11				Reduncini
LD	278	1	L	U	M1 or M2	18e	18.6				Reduncini
LD	286	1	R	U	M1 or M2	15.2	11.6	23.3	almost unworn	cf.	Reduncini
LD	90	1	L	L	m1-3	56.6					Reduncini
LD	382	1	L	L	m2	17.5e	9.5				Reduncini
LD	90	1	L	L	m2	18.06	9.74				Reduncini
LD	544	1	L	U	M2	18.6e	na			cf.	Reduncini
LD	382	1	L	L	m3	23.5	11.9				Reduncini
LD	447	5	L	L	m3	24.6	11.5	30e	early early wear		Reduncini
LD	90	1	L	L	m3	22.93	8.26				Reduncini
LD	544	1	L	U	M3	19.5	na			cf.	Reduncini
LD	483	1	R	L	m3 frag	24e	11				Reduncini
LD	712	1	L	L	m3 frag	na	10.3			cf.	Reduncini	cf.	Kobus
LD	90	1	L	L	p2-4 alveolar	35.4					Reduncini
LD	249	1	L	L	p4	13.5	8.5				Reduncini
LD	382	1	L	L	p4	12.5	8.8				Reduncini
LD	304	44	na	U	M frag	28e	15.5				Tragelaphini		Tragelaphus		rastafari/nakuae
LD	604	1	L	L	m1	14.8	10.4				Tragelaphini		Tragelaphus		gaudryi
LD	489	2	L	R	m1	30.1	15.8				Tragelaphini		Tragelaphus		rastafari/nakuae
LD	483	8	L	U	M1	24.3	14.6	36.8	almost unworn		Tragelaphini		Tragelaphus		rastafari/nakuae
LD	182	8	R	L	m1 or m2	16.5	9.2				Tragelaphini		Tragelaphus		rastafari/nakuae
LD	155	2	R	U	M1 or M2 frag	24.4	18			cf.	Tragelaphini
LD	604	1	L	L	m1-3	58e					Tragelaphini		Tragelaphus		gaudryi
LD	259	1	L	L	m2	29.1	15.8				Tragelaphini		Tragelaphus		rastafari/nakuae
LD	604	1	L	L	m2	17.8e	12				Tragelaphini		Tragelaphus		gaudryi
LD	259	1	L	L	m3	38.6	15.6	37.1	mid early wear		Tragelaphini		Tragelaphus		rastafari/nakuae
LD	604	1	L	L	m3	26e	12.1				Tragelaphini		Tragelaphus		gaudryi
LD	702	1	R	U	M3	26.4	23.9				Tragelaphini		Tragelaphus		rastafari/nakuae
LD	346	5	L	R	m3 frag	38e	18e				Tragelaphini		Tragelaphus		rastafari/nakuae
LD	646	1	L	L	p3	21.2	10.1				Tragelaphini		Tragelaphus		rastafari/nakuae
LD	341	3	L	L	p4	14.1	8.1				Tragelaphini		Tragelaphus		gaudryi
LD	474	2	R	L	m1 frag	na	10.3
LD	288	1	R	L	m1 or m2	18e	8e		unworn (erupting)
LD	474	2	R	L	m2	19.8	10.6
LD	292	1	R	L	m3	18.2	7.2	33.8	unworn (erupting)
LD	353	1	R	L	p4	19.27	12.18

## Sheet: Table 4S Connochaetes Postcran
LD 390-1	Maximum length	Articular length if different	Proximal maximum T	Proximal Articular T if different	Proximal maximum AP	Distal maximum T	Distal articular T if different	Distal maximum AP	Distal articular AP if different	Midshaft minimum T	Midshaft minimum AP
Humerus (L)	265	235	81.4	57.9	84.7	61		59.9		32.4	36.8
Humerus (R)	265	230	82.7	54.3	83.7	59.6		60.1		32.1	37.4
Radius (L)	325		65.6	57.1	33.3	55.5	47.9	39.8	31.4	34.7	22.5
Radius (R)	320		66.1	60.5	33c	52.4	44.3	41.1	30.6	33.7	24.1
Metacarpal (L)	255		48.2		29.5	48.9		30.3		27.8	22.1
Metacarpal (R)	255		48.1		30	49		30.3		28.4	23.5
Femur (L)	325	305	102.4	52.9	49.8	75.4		106		30.1	34.3
Tibia (L)	355	315	84.2		74.2	48.4		42.2		35.3	26
Metatarsal (L)	-	-	-		-	43.8		28.5		-	-
Metatarsal (R)	270	265	39.4		40.4	44.5		29.1		25.9	24.7
Astragalus (L)	56.1		34.3		37.2	36.2		30
Calcaneum (L)	117.3		27.3		33.2	34.8		44.6

## Sheet: Table 5S Astragali
Specimen	SIDE	WAF	B	ProxRad	DistRad	MML	Notes	Habitat Classification	Probability
LD 82-1a	R	25.96	14.02	13.18	11.12	41.13		Open	0.999984
LD 390-1 (LD 162-1r)	L	33.27	20.3	15.88	14.65	52.37	Connochaetes	Open	0.998284
LD 649-1	L	26.71	26.15	13.59	10.47	47.28		Forest	0.993962
LD 13-1	R	26.81	15.73	12.3	9.84	41.29		Open	0.991098
LD 541-2	L	44.36	28.26	24.85	21.27	70		Open	0.978105
LD 511-1	R	33.68	22.41	16.64	15.26	54.11		Open	0.969414
LD 304-6	R	36.11	22.36	16.1	13.32	56.03		Open	0.963548
LD 95-1	L	26.48	17.35	14.19	10.89	44.18		Open	0.946961
LD 718-1	R	18.76	13.75	6.25	5.5	30.74		HeavyCover	0.798883
LD 351-3	R	27.36	15.99	12.37	9.79	38.73		Open	0.723361
LD 71-1	R	43.6	27.31	17.87	13.91	61.53	cf. Bovini	HeavyCover	0.613373
LD 370-2	R	23.52	18.65	9.22	9.15	41.01		Open	0.610605
LD 324-5	L	41.18	29.84	21.48	16.2	66.68	cf. Bovini	Forest	0.605907
LD 611-1	R	28.25	20.94	14.58	10.8	47.15		NA	0.524752
LD 563-1	R	33.75	28.48	15.27	13.61	54.62		NA	0.501153
LD 278-2	R	23.12	16.26	10.22	8.59	35.07		NA	0.491615
LD 461-2	L	35.6	21.81	18.43	13.55	52.64		NA	0.406373
LD 79-1	L	30.81	19.67	14.75	11.31	44.12		NA	0.344371
LD 99-1b	R	32.94	22.56	11.65	NA	55.41	Can't measure
LD 582-1	R	NA	NA	NA	10.45	NA	Can't measure
LD 16-3	NA	NA	NA	NA	NA	NA	Can't measure

## Sheet: Table 6S Phalanges
Specimen	Element	Character 4		Character 6		Character 11		Character 14		Character 16		Character 21		Character 23		Notes
LD 137-1	proximal phalanx	a1, rough	F/H	b1, very visible	-											Bovini?
LD 291-1	proximal phalanx	a1, rough	F/H	b1, very visible	-											Bovini?
LD 203-1	proximal phalanx	a2, smooth	L/O	b1, very visible	-
LD 185-1	proximal phalanx	a2, smooth	L/O	b1, very visible	-
LD 114-1	proximal phalanx	a2, smooth	L/O	b1, very visible	-
LD 63-1	proximal phalanx	a2, smooth	L/O	b1, very visible	-
LD 187-1	proximal phalanx	a2, smooth	L/O	b1, very visible	-
LD 162-1	intermediate phalanx					not scorable	-	c2, oval w/ apex directed palmarly	L/O	b1, groove	F/H
LD 110-4	intermediate phalanx					a2, short	L/O	c2, oval w/ apex directed palmarly	L/O	b2, absent	-
LD 74-3	intermediate phalanx					a2, short	L/O	c2, oval w/ apex directed palmarly	L/O	b2, absent	-
LD 304-8	intermediate phalanx					a2, short	L/O	c2, oval w/ apex directed palmarly	L/O	b2, absent	-
LD 198-4	intermediate phalanx					a2, short	L/O	c2, oval w/ apex directed palmarly	L/O	b2, absent	-					Bovini?
LD 82-1b	distal phalanx											a2, limited	L/O	a2, angled	L/O

## Sheet: Table 7S Hypsodonty
Assemblage	Taxon	Specimen Number	Member	U/L	Tooth	Wear (or age)	Length	Occlusal Width	Height	Estimate or approx?	Hyp. Index H/OW	Hyp Index Ht / L	Notes
2.5 Sterkfontein Type Site	Alcelaphini			L	m3	unworn or almost unworn	22		38	length, height		1.7	est from Gentry 1980 fig 43
2.5 Sterkfontein Type Site	Alcelaphini			L	m3	unworn or almost unworn	24		40	length, height		1.7	est from Gentry 1980 fig 43
2.5 Sterkfontein Type Site	Alcelaphini			L	m3	unworn or almost unworn	29		45	length, height		1.6	est from Gentry 1980 fig 43
00 Modern Alcelaphini	Connochaetes gnou			L	m3	3	26.4	9.8	49		5	1.9	Janis 1988
00 Modern Alcelaphini	Damaliscus pygargus			L	m3	4.5	20	9	37		4.1	1.9	Janis 1988
00 Modern Alcelaphini	Alcelaphus buselaphus			L	m3	4	24	9	44		4.9	1.8	Janis 1988
00 Modern Alcelaphini	Alcelaphus buselaphus			L	m3	4	25	9.8	45		4.6	1.8	Janis 1988
00 Modern Alcelaphini	Damaliscus lunatus			L	m3	4	26	8.6	46.5		5.4	1.8	Janis 1988
00 Modern Alcelaphini	Connochaetes taurinus			L	m3	4.5	32	11.9	57		4.8	1.8	Janis 1988
00 Modern Alcelaphini	Alcelaphus buselaphus			L	m3	4	22.8	8.5	40		4.7	1.8	Janis 1988
00 Modern Alcelaphini	Damaliscus pygargus			L	m3	4	19.7	6.4	34.5		5.4	1.8	Janis 1988
00 Modern Alcelaphini	Damaliscus lunatus			L	m3	4	25	8.4	42		5	1.7	Janis 1988
00 Modern Alcelaphini	Connochaetes gnou			L	m3	3.5	26.9	10.8	45		4.2	1.7	Janis 1988
00 Modern Alcelaphini	Connochaetes taurinus			L	m3	4	32.7	11.6	54.5		4.7	1.7	Janis 1988
00 Modern Alcelaphini	Connochaetes gnou			L	m3	4	27	10.6	44.7		4.2	1.7	Janis 1988
00 Modern Alcelaphini	Connochaetes taurinus			L	m3	4	30.5	11.4	49.5		4.3	1.6	Janis 1988
00 Modern Alcelaphini	Alcelaphus buselaphus			L	m3	3.5	24.7	7.9	40		5.1	1.6	Janis 1988
00 Modern Alcelaphini	Connochaetes taurinus			L	m3	4.5	33	12	52		4.3	1.6	Janis 1988
00 Modern Alcelaphini	Alcelaphus buselaphus			L	m3	3.5	23.2	8.3	35.9		4.3	1.5	Janis 1988
00 Modern Alcelaphini	Damaliscus pygargus			L	m3	3	21.5	7	33		4.7	1.5	Janis 1988
00 Modern Alcelaphini	Alcelaphus buselaphus			L	m3	3	24	7	36		5.1	1.5	Janis 1988
00 Modern Alcelaphini	Connochaetes taurinus			L	m3	4.5	33	12	47		3.9	1.4	Janis 1988
00 Modern Alcelaphini	Alcelaphus buselaphus			L	m3	4	23.2	8.6	32		3.7	1.4	Janis 1988
00 Modern Alcelaphini	Alcelaphus buselaphus			L	m3	4	24	8.4	33		3.9	1.4	Janis 1988
00 Modern Alcelaphini	Alcelaphus buselaphus			L	m3	4.5	29.3	10.3	39.5		3.8	1.3	Janis 1988
00 Modern Alcelaphini	Damaliscus lunatus			L	m3	4	27.5	8.8	36.5		4.1	1.3	Janis 1988
00 Modern Alcelaphini	Connochaetes gnou			L	m3	3.5	27.6	10	36.5		3.7	1.3	Janis 1988
00 Modern Alcelaphini	Connochaetes taurinus			L	m3	4	30	10.5	39.5		3.8	1.3	Janis 1988
00 Modern Alcelaphini	Alcelaphus buselaphus			L	m3	3.5	24.4	8.7	32		3.7	1.3	Janis 1988
00 Modern Alcelaphini	Connochaetes taurinus			L	m3	4	29.5	9.8	38		3.9	1.3	Janis 1988
00 Modern Alcelaphini	Damaliscus pygargus			L	m3	3	20.6	5.9	26.5		4.5	1.3	Janis 1988
0 Modern Tragelaphini	TRSTR			L	m3	4	22.7	10	29.4		2.9	1.3	Janis 1988
0 Modern Tragelaphini	TRANG			L	m3	2.5	22.3	6.3	25		4	1.1	Janis 1988
0 Modern Tragelaphini	TRSPK			L	m3	4	24.2	7.4	26.5		3.6	1.1	Janis 1988
0 Modern Tragelaphini	TRSTR			L	m3	4	32.6	12.4	34		2.7	1	Janis 1988
0 Modern Tragelaphini	TRSPK			L	m3	2	18.4	6.2	19		3.1	1	Janis 1988
0 Modern Tragelaphini	TORYX			L	m3	4	36.3	14.5	36.5		2.5	1	Janis 1988
0 Modern Tragelaphini	TRANG			L	m3	4	24.6	8.9	23.5		2.6	1	Janis 1988
0 Modern Tragelaphini	TRANG			L	m3	4	23.5	8.5	22		2.6	0.9	Janis 1988
0 Modern Tragelaphini	TRSTR			L	m3	4	34.4	13	30		2.3	0.9	Janis 1988
0 Modern Tragelaphini	TRSPK			L	m3	3.5	22.9	7.2	19.5		2.7	0.9	Janis 1988
0 Modern Tragelaphini	TRBUX			L	m3	4.5	28	13	23.8		1.8	0.9	Janis 1988
0 Modern Tragelaphini	TRSPK			L	m3	4.5	21.3	7.8	18		2.3	0.8	Janis 1988
0 Modern Tragelaphini	TRSPK			L	m3	3	21	6.7	17.5		2.6	0.8	Janis 1988
0 Modern Tragelaphini	TEURY			L	m3	4.5	33.4	13.6	27.8		2	0.8	Janis 1988
0 Modern Tragelaphini	TRSPK			L	m3	4.5	21.2	7.8	17.5		2.2	0.8	Janis 1988
0 Modern Tragelaphini	TRSPK			L	m3	2.5	22	6.4	18		2.8	0.8	Janis 1988
0 Modern Tragelaphini	TRBUX			L	m3	4	29	10.4	23.6		2.3	0.8	Janis 1988
0 Modern Tragelaphini	TORYX			L	m3	4	37.9	14.9	29.4		2	0.8	Janis 1988
0 Modern Tragelaphini	TRBUX			L	m3	2.5	29.3	9	21.8		2.4	0.7	Janis 1988
0 Modern Tragelaphini	TRSCR			L	m3	4	18.6	6.4	13.5		2.1	0.7	Janis 1988
0 Modern Tragelaphini	TORYX			L	m3	2	36	8.8	25		2.8	0.7	Janis 1988
0 Modern Tragelaphini	TRSPK			L	m3	4.5	22.4	9	15.5		1.7	0.7	Janis 1988
0 Modern Tragelaphini	TRANG			L	m3	4.5	25.7	10	16.7		1.7	0.6	Janis 1988
0 Modern Tragelaphini	TRSCR			L	m3	4	17.4	7	11.3		1.6	0.6	Janis 1988
0 Modern Tragelaphini	TRIMB			L	m3	3	25.8	8.6	16.5		1.9	0.6	Janis 1988
0 Modern Tragelaphini	TRIMB			L	m3	4.5	27.4	10.1	17.4		1.7	0.6	Janis 1988
3.5-3.2 Hadar	Alcelaphini	A.L. 120-3	DD3	L	m3	late-early	32.5	11.3	42.7		3.8	1.3
3.5-3.2 Hadar	Alcelaphini	A.L. 158-14	DD2	L	m3	early-mid	30.9	11.9	44.2		3.7	1.4
3.5-3.2 Hadar	Alcelaphini	A.L. 163-1	DD3	L	m3	early-early	30.7	9.2	46.9	length	5.1	1.5
3.5-3.2 Hadar	Alcelaphini	A.L. 177-22	DD2	L	m3	late-early	28.9	9.5	41.6		4.4	1.4
3.5-3.2 Hadar	Alcelaphini	A.L. 181-4a	DD2	L	m3	early-early	35.8	10.5	46.9		4.5	1.3
3.5-3.2 Hadar	Alcelaphini	A.L. 188-11a	DD3	L	m3	early-early	32	10.4	46.4		4.5	1.5
3.5-3.2 Hadar	Alcelaphini	A.L. 196-5	DD3	L	m3	early-mid	33.5	10.4	44.6		4.3	1.3
3.5-3.2 Hadar	Alcelaphini	A.L. 220-11	DD2	L	m3	early-mid	34.4	11.7	43.2	height	3.7	1.3
3.5-3.2 Hadar	Alcelaphini	A.L. 220-4	DD3	L	m3	early-mid	31.7	9.7	39.5	height	4.1	1.2
3.5-3.2 Hadar	Alcelaphini	A.L. 295-8	DD2	L	m3	early-early	36	10.2	51.7		5.1	1.4
3.5-3.2 Hadar	Alcelaphini	A.L. 326-7	SH4	L	m3	early-early	33	9.2	48.5		5.3	1.5
3.5-3.2 Hadar	Alcelaphini	A.L. 358-6	DD1	L	m3	early-early	30.5	9.4	41.3	length	4.4	1.4
3.5-3.2 Hadar	Alcelaphini	A.L. 406-27	SH1	L	m3	early-mid	30.5	10.5	41.6	length	4	1.4
2.9-2.5 Ledi Geraru	Alcelaphini	A.L. 71-1	unknown	L	m3	early-early		11.9	51.1	no length possible	4.3
2.9-2.5 Ledi Geraru	Alcelaphini	A.L. 87-3	Lee Adoyta	L	m3	late-early		11.9	56.1	no length possible	4.7
3.7 Laetoli UL	Alcelaphini	EP 1089/00	ULaet	L	m3	early	22.2		34	length		1.5	Gentry pers comm
3.7 Laetoli UL	Alcelaphini	EP 1585/98	ULaet	L	m3	early	23.6		37.5	length		1.6	Gentry pers comm
3.7 Laetoli UL	Alcelaphini	EP 299/04	ULaet	L	m3	early	25	7.6	41		5.4	1.6	Gentry 2010
3.7 Laetoli UL	Alcelaphini	EP 3355/00	ULaet	L	m3	early	27.6	8.9	31.6		3.6	1.1	Gentry 2010
3.7 Laetoli UL	Alcelaphini	EP 3860/00	ULaet	L	m3	early	23.4		33.5	height		1.4	Gentry 2010
3.7 Laetoli UL	Alcelaphini	EP 474/00	ULaet	L	m3	early	29.5	8.9	36	length, width	4	1.2	Gentry 2010
3.7 Laetoli UL	Alcelaphini	EP 622	ULaet	L	m3	early	23.4		35.4	length		1.5	Gentry pers comm
2.6 Laetoli UN	Alcelaphini	EP 860/00	UNdol	L	m3	middle or early	20.7		30.7			1.5	Gentry 2010
4.1 Kanapoi	Alcelaphini	KP 108	Kanapoi	L	m3	mid early	27.5	10.3	44	length approx, height (42.6)	4.3	1.6
5.1 Langebaanweg	Alcelaphini	L --45		L	m3	unworn or early wear	29.1		37.9			1.3	Gentry pers comm
5.1 Langebaanweg	Alcelaphini	L 107941A		L	m3	unworn or early wear	27.6		36.4			1.3	Gentry pers comm
5.1 Langebaanweg	Alcelaphini	L 12487		L	m3	unworn or early wear	29.5		37.7			1.3	Gentry pers comm
5.1 Langebaanweg	Alcelaphini	L 40120		L	m3	unworn or early wear	26.9		33.1			1.2	Gentry pers comm
5.1 Langebaanweg	Alcelaphini	L 40120		L	m3	unworn or early wear	29.8		33.2	length		1.1	Gentry pers comm
5.1 Langebaanweg	Alcelaphini	L 40540		L	m3	unworn or early wear	27.9		31.9			1.1	Gentry pers comm
5.1 Langebaanweg	Alcelaphini	L 40580		L	m3	unworn or early wear	26.3		32.2			1.2	Gentry pers comm
5.1 Langebaanweg	Alcelaphini	L 40940		L	m3	unworn or early wear	30		36.2	length		1.2	Gentry pers comm
5.1 Langebaanweg	Alcelaphini	L 41032		L	m3	unworn or early wear	28.9		31			1.1	Gentry pers comm
5.1 Langebaanweg	Alcelaphini	L 41250		L	m3	unworn or early wear	29		35.6			1.2	Gentry pers comm
5.1 Langebaanweg	Alcelaphini	L 41323		L	m3	unworn or early wear	26		32.1			1.2	Gentry pers comm
5.1 Langebaanweg	Alcelaphini	L 41522		L	m3	unworn or early wear	27.7		34.9			1.3	Gentry pers comm
5.1 Langebaanweg	Alcelaphini	L 46056		L	m3	unworn or early wear	27.2		38.4			1.4	Gentry pers comm
5.1 Langebaanweg	Alcelaphini	L 6446		L	m3	unworn or early wear	30.3		37.1			1.2	Gentry pers comm
5.1 Langebaanweg	Alcelaphini	L 9152		L	m3	unworn or early wear	26.7		34			1.3	Gentry pers comm
2.9-2.5 Ledi Geraru	Alcelaphini	LD 130-1	Gurumaha	L	m3	late-early	30.6	12.1	46	height	3.8	1.5
2.9-2.5 Ledi Geraru	Alcelaphini	LD 246-1	Lee Adoyta / Garsalu East	L	m3	almost unworn		12.6	52.8	no length possible	4.2
3.45 Kaiyumung	Alcelaphini	LT 217	Kaiyumung	L	m3	mid early	25.5	8.7	47	height (44.1)	5.4	1.8
3.45 Kaiyumung	Alcelaphini	LT 26186	Kaiyumung	L	m3	late early	25.5	8.5	46	height (44.0)	5.4	1.8
3.7 Laetoli KL	Alcelaphini	MB Ma 38641	?	L	m3	late-early	27.4	10.5	45	height (41.2 pres.)	4.3	1.6
3.7 Laetoli KL	Alcelaphini	MB Ma 38642	?	L	m3	late-early	27.3	11	43	height (38.9 pres.)	3.9	1.6
3.7 Laetoli KL	Alcelaphini	MB Ma 38648	?	L	m3	almost unworn	26.3	11	41.5	height (41.3 pres.)	3.8	1.6
2.9-2.5 Ledi Geraru	Alcelaphini	LD 474-1	Gurumaha	L	m3	early wear		10.6	52.5		5
2.9-2.5 Ledi Geraru	Alcelaphini	LD 689-1	Gurumaha	L	m3	early wear	30.6		48	height (47.3 pres.)		1.6
2.9-2.5 Ledi Geraru	Alcelaphini	LD 478-2	Gurumaha	L	m3	early early wear		11.7	53	height (51.0 pres.)	4.5
2.9-2.5 Ledi Geraru	Alcelaphini	LD 393-3	Gurumaha	L	m3	almost unworn		12.2	51.6		4.2
2.9-2.5 Ledi Geraru	Alcelaphini	LD 477-2	Gurumaha	L	m3	early wear		10.9	51	height (47.2 pres.)	4.7
